# Supplementary material for: Engineering enzymatic cascades for the efficient biotransformation of eugenol and taxifolin to silybin and isosilybin
Source: Royal Society of Chemistry journal article supplement (doi:10.1039/c8gc03728k), 2019-01-01
Supplement: c8gc03728k1.pdf [file c8gc03728k1.pdf]

1 **Electronic Supplementary Material (ESI)**

2 **Engineering enzymatic cascades for efficient biotransformation of eugenol and**  
3 **taxifolin to silybin and isosilybin**

4

5 Yongkun Lv<sup>a</sup>, Sha Xu<sup>b</sup>, Yunbin Lyu<sup>a,b</sup>, Shenghu Zhou<sup>a</sup>, Guocheng Du<sup>a</sup>, Jian Chen<sup>a,b</sup>,

6 Jingwen Zhou<sup>a,b,c\*</sup>

7

8 a. Key Laboratory of Industrial Biotechnology, Ministry of Education and School of  
9 Biotechnology, Jiangnan University, 1800 Lihu Road, Wuxi, Jiangsu 214122, China.

10 b. National Engineering Laboratory for Cereal Fermentation Technology (NELCF),  
11 Jiangnan University, 1800 Lihu Road, Wuxi, Jiangsu 214122, China.

12 c. Jiangsu Provisional Research Center for Bioactive Product Processing  
13 Technology, Jiangnan University, 1800 Lihu Road, Wuxi, Jiangsu 214122, China.

14

15 \* Corresponding author:

16 E-mail address: zhoujw1982@jiangnan.edu.cn (J. Zhou).

17 Mailing address: School of Biotechnology, Jiangnan University, 1800 Lihu Road,  
18 Wuxi, Jiangsu 214122, China

19 Phone: +86-510-85918312, Fax: +86-510-85918309

20

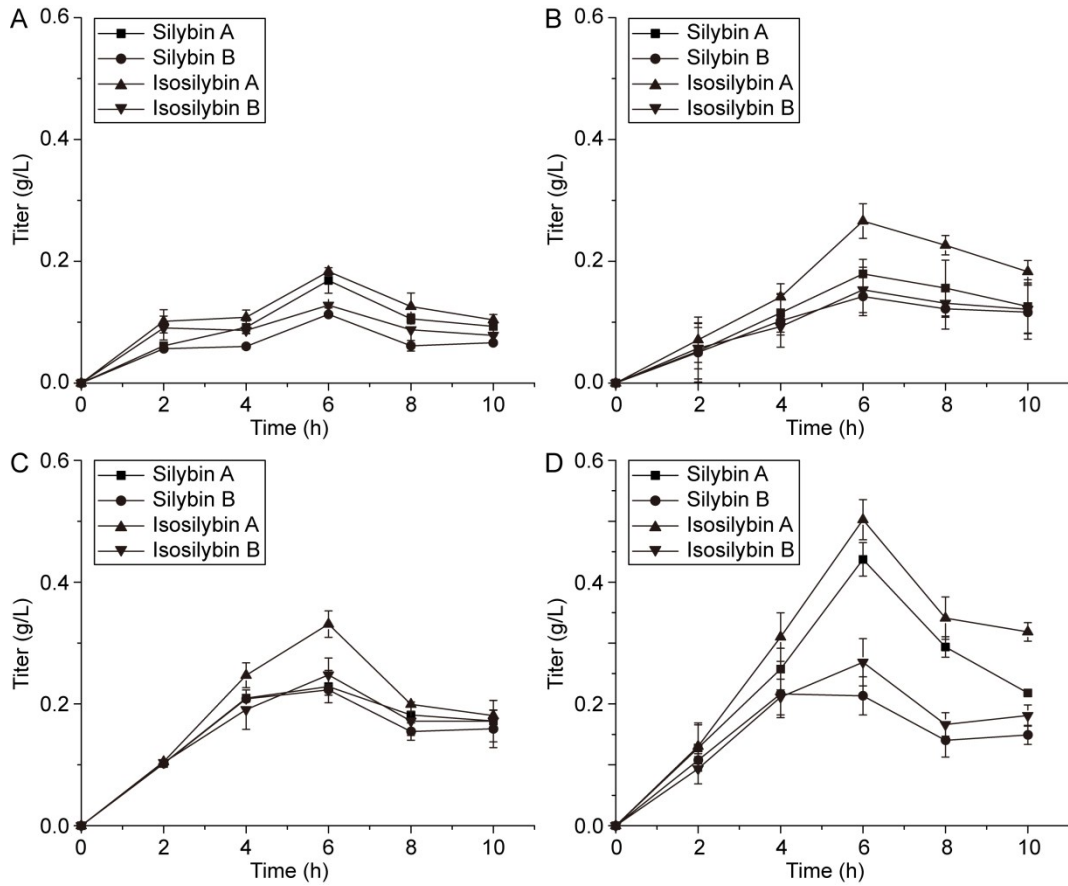

21

22 **Figure S1** Silybin and isosilybin titers in bioconversions of different feeding rates.

23 The starting concentration was 5 mM eugenol and 1 mM taxifolin. The feeding rate

24 was **(A)** 6.25  $\mu$ L/h, equal to 0.25 mM/h eugenol and 0.05 mM/h taxifolin, **(B)** 12.5

25  $\mu$ L/h, equal to 0.5 mM/h eugenol and 0.1 mM/h taxifolin, **(C)** 25  $\mu$ L/h, equal to 1

26 mM/h eugenol and 0.2 mM/h taxifolin, and **(D)** 62.5  $\mu$ L/h, equal to 2.5 mM/h eugenol

27 and 0.5 mM/h taxifolin.

28

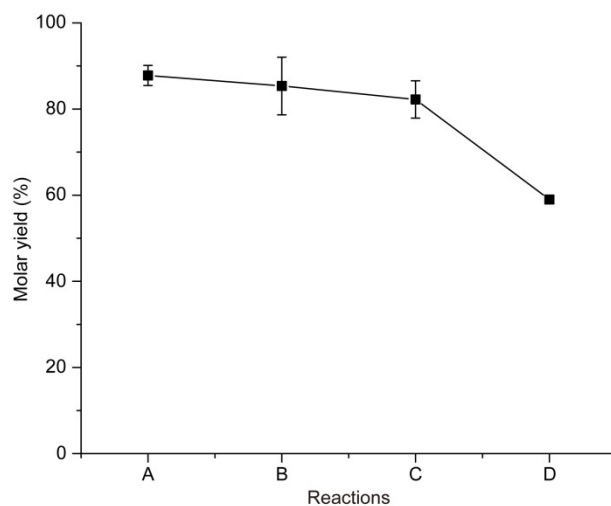

29

30 **Figure S2** Molar yields of silybin and isosilybin in bioconversions of different  
31 feeding rates. The starting concentration was 5 mM eugenol and 1 mM taxifolin. The  
32 feeding rate was **(A)** 6.25  $\mu\text{L}/\text{h}$ , equal to 0.25 mM/h eugenol and 0.05 mM/h taxifolin,  
33 **(B)** 12.5  $\mu\text{L}/\text{h}$ , equal to 0.5 mM/h eugenol and 0.1 mM/h taxifolin, **(C)** 25  $\mu\text{L}/\text{h}$ , equal  
34 to 1 mM/h eugenol and 0.2 mM/h taxifolin, and **(D)** 62.5  $\mu\text{L}/\text{h}$ , equal to 2.5 mM/h  
35 eugenol and 0.5 mM/h taxifolin. The molar yield was calculated based on taxifolin.  
36

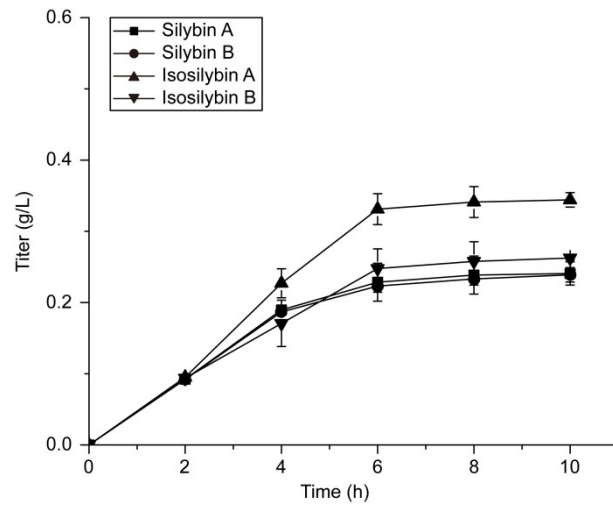

37

38 **Figure S3** Bioconversion under pH6.0. The starting concentration was 5 mM eugenol  
39 and 1 mM taxifolin. The feeding rate was 25  $\mu$ L/h. The bioconversion was carried out  
40 in the fermented broth, and the pH was adjusted to 6.0 using 1 M HCl.

41

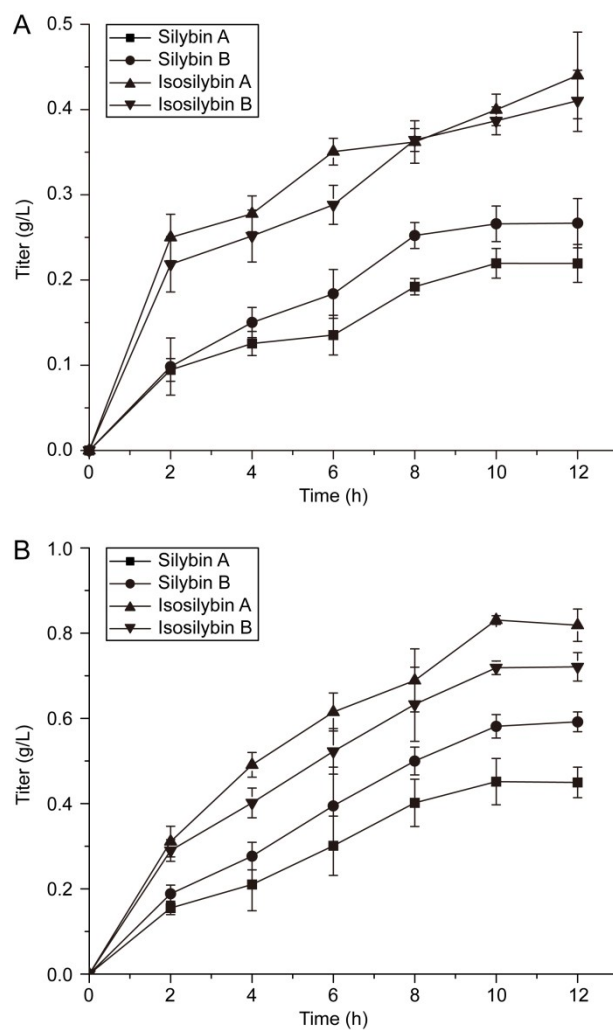

42

43 **Figure S4** Scale-up of the bioconversion. The bioconversions were carried out in 1.5-

44 L in a 3.0-L fermenter. The starting concentration was 5 mM eugenol and 1 mM

45 taxifolin. The feeding rates were 1.5 mL/h (**A**) and 3.75 mL/h (**B**), respectively.

46

47 **Table S1** Ratio of isomers produced by different peroxidases

| Peroxidase     | Silybin A (%) | Silybin B (%)   | Isosilybin A (%) | Isosilybin B (%) |
|----------------|---------------|-----------------|------------------|------------------|
| EcoDyPrx02_536 | 16.39±3.02    | 15.55±2.66      | 43.30±3.63       | 24.75±7.07       |
| EcoDyPrx01_K12 | 11.78±2.93    | ND <sup>1</sup> | 88.22±2.73       | ND               |
| SceCcP01       | 17.28±0.64    | 20.33±1.12      | 36.31±1.61       | 26.09±1.26       |
| PpasCcP01      | 17.98±4.39    | 20.19±5.14      | 36.22±6.74       | 25.61±3.86       |
| APX1           | 17.79±0.71    | 21.66±0.67      | 35.51±0.76       | 25.03±0.38       |

48 1. ND refers to not detected.

49

50 **Table S2** Primers used in this study

| Primers       | Sequence (5' to 3')                                                       |
|---------------|---------------------------------------------------------------------------|
| SceCcP01 F    | <u>GGAATTC</u> ATGACTACTGCTGTTAGGCTTTTAC <sup>1</sup>                     |
| SceCcP01 R    | CCGCTCGAGTAAACCTTGTTCCCTCTAAAGTC                                          |
| PpasCcP01 F   | <u>GGAATTC</u> ATGTCGTCCATTGCATTCCATACAT                                  |
| PpasCcP01 R   | CCAAGCTTACTCTGCTCGTCTAGTGTCCTG                                            |
| APX1-PsVAO F1 | <u>GGAATTC</u> ATGCCGGTGGTTGATAACCGA                                      |
| APX1-PsVAO R1 | CGAAATTCCTGGGTTTTGCTCAT <u>AGAACCACCAC</u><br><u>CCATTTTCTTACGGGCTTCG</u> |
| APX1-PsVAO F2 | CTACGAAGCCCGTAAGAAAATGGGTGGTGGTTCT<br>ATGAGCAAAACCCAGGAATTTC              |
| APX1-PsVAO R2 | CCAAGCTTACAGTTTCCAGGTGACGTGGC                                             |
| PsVAO-APX1 F1 | <u>GGAATTC</u> ATGAGCAAAACCCAGGAATTTC                                     |
| PsVAO-APX1 R1 | ATTCGGTATCAACCACCGGCAT <u>AGAACCACCACC</u><br>CAGTTTCCAGGTGACGTGGC        |
| PsVAO-APX1 F2 | GCCACGTCACCTGGAAACTGGGTGGTGGTTCTAT<br>GCCGGTGGTTGATAACCGAATATC            |
| PsVAO-APX1 R2 | CCAAGCTTACATTTTCTTACGGGCTTCG                                              |

51 1. Underlined letters refer to restriction enzymes or overlapping sequences.

52
